# Supplementary material for: A Statistical Similarity/Dissimilarity Analysis of Protein Sequences Based on a Novel Group Representative Vector
Source: Hindawi journal article supplement (doi:10.1155/2019/8702968), 2019-05-08

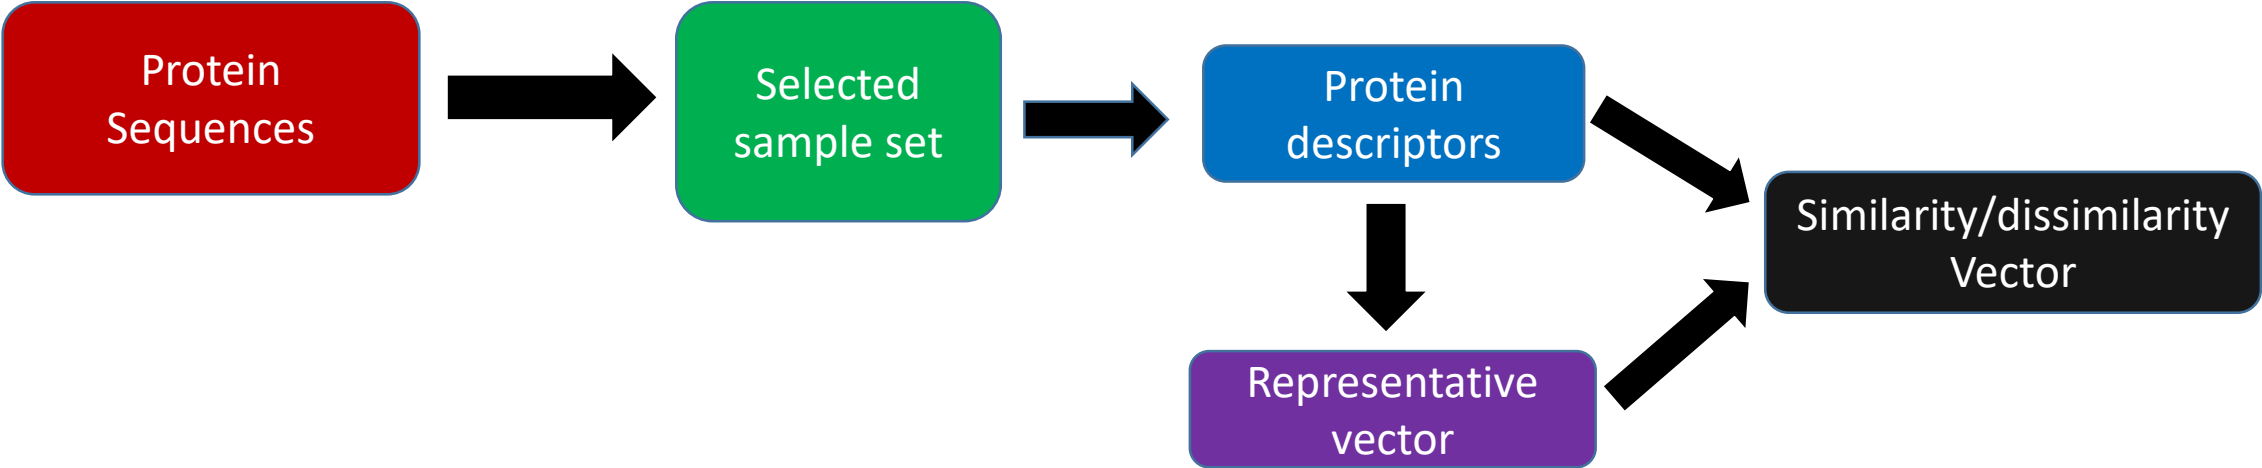

Supplement: f1 [file 8702968.f1.pdf]
